# Supplementary material for: Activation of C-reactive protein proinflammatory phenotype in the blood retinal barrier in vitro: implications for age-related macular degeneration
Source: Aging (Albany NY). 2020 Jul 16;12(14):13905–23. doi: 10.18632/aging.103655 (PMC7425453; doi:10.18632/aging.103655)
Supplement: Supplementary Figures [file aging-12-103655-s001..pdf]

## SUPPLEMENTARY FIGURES

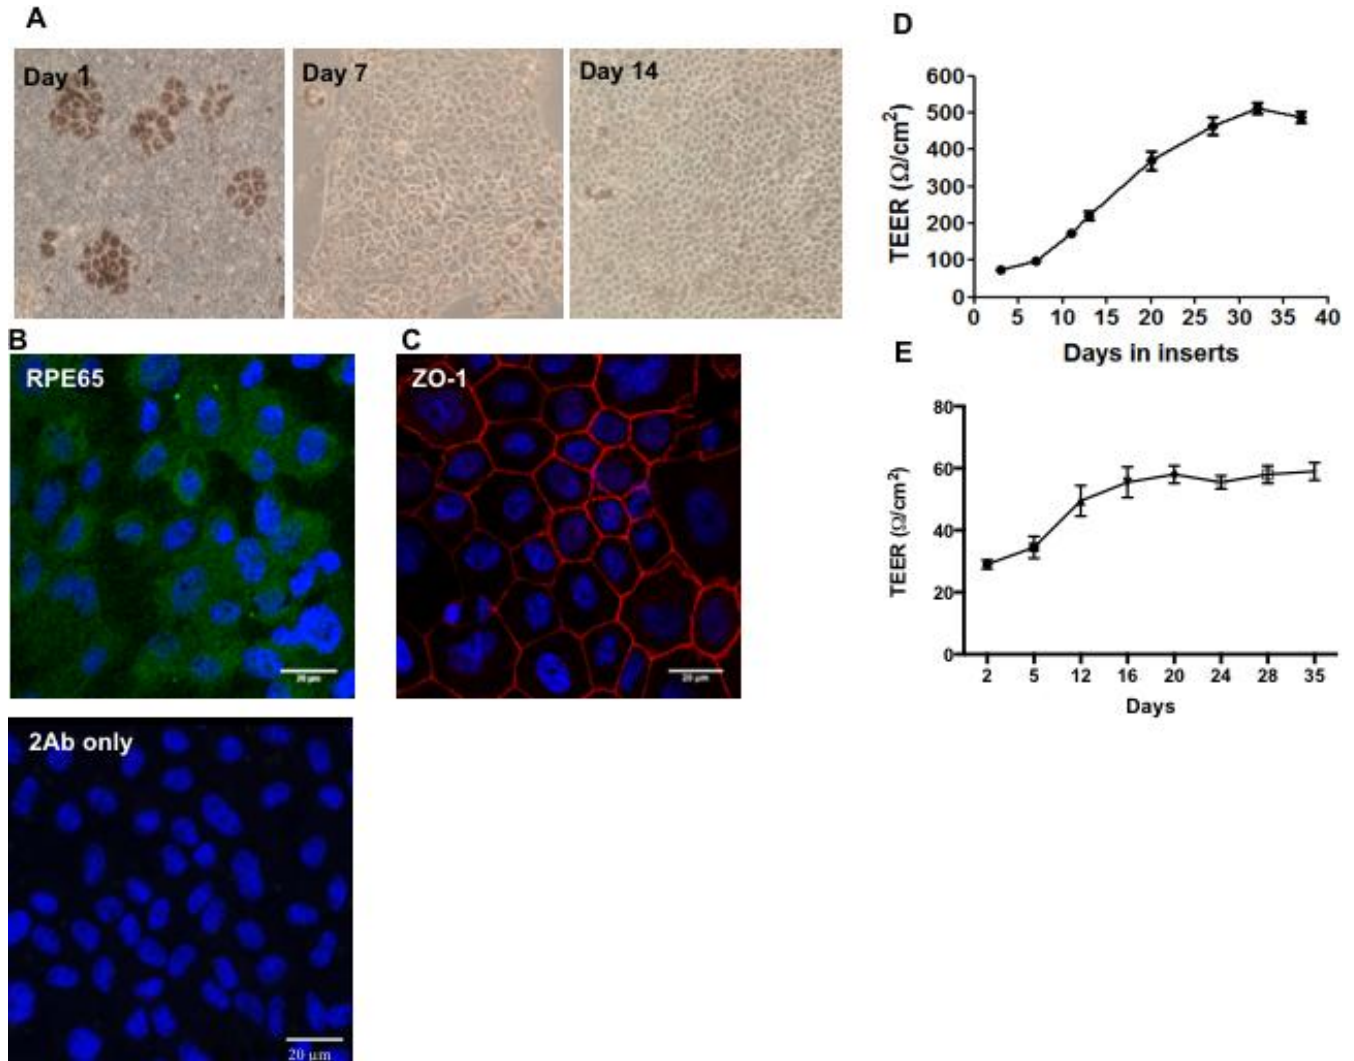

**Supplementary Figure 1. Characterization of RPE cells.** (A) Cells harvested for 1, 7 and 14 days after plating. Objective lens 10x. Primary porcine RPE cells cultured for 30 days were stained with antibodies to RPE65 (green) (B) and ZO-1 (red) (C). Scale bar = 20  $\mu\text{m}$ . (D) TEER values of primary porcine RPE cells plated at 280,000 cells/ $\text{cm}^2$  on laminin coated Transwell™ filters. (E) TEER values of ARPE-19 cells plated at 250,000 cells/ $\text{cm}^2$  on Transwell™ filters for 35 days.

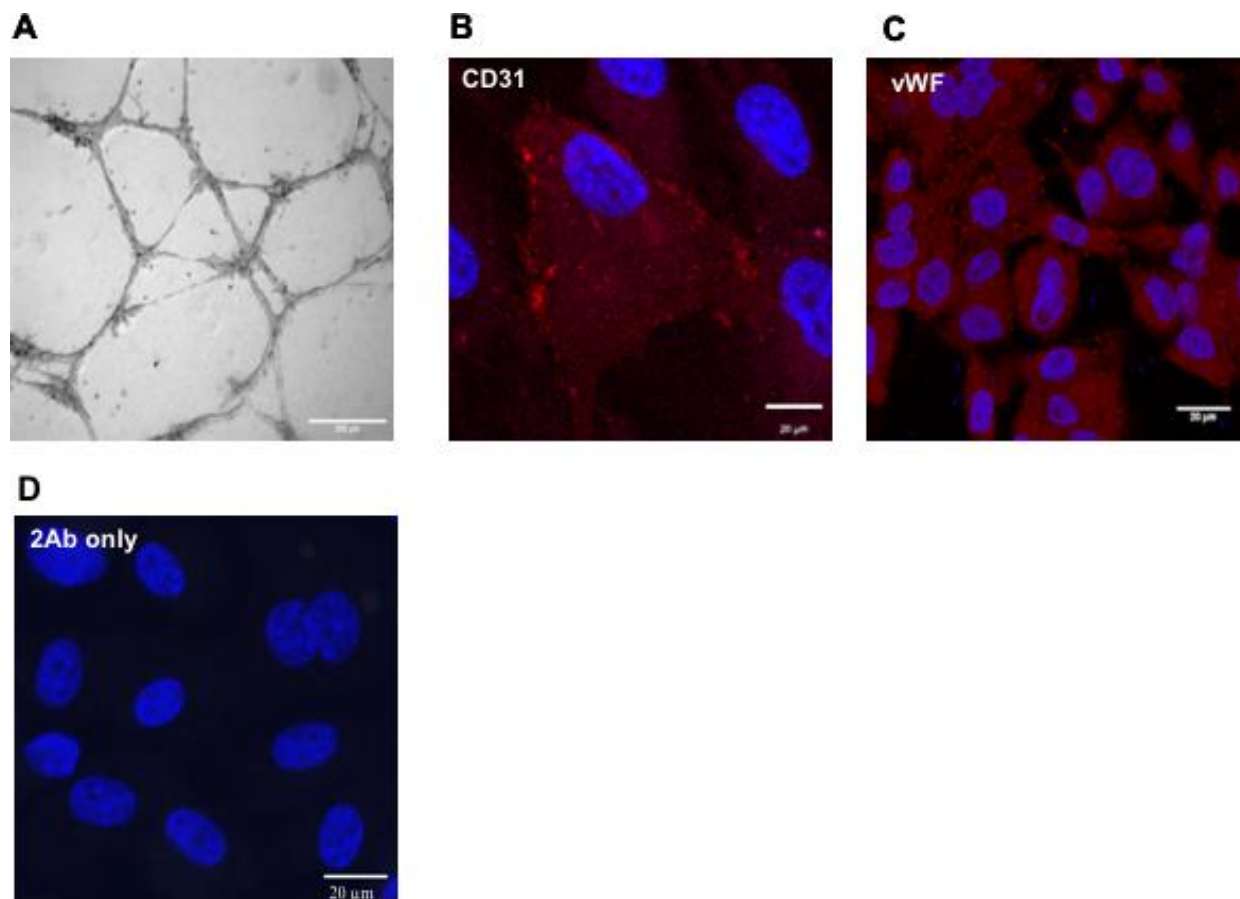

**Supplementary Figure 2. Characterization of primary porcine CECs.** (A) Primary porcine CECs were cultured into pure matrigel-coated wells and allowed to form capillary-like structures for 24 hours. Scale bar = 500 μm. Primary porcine CECs were stained with antibodies against CD31 (B) and VWF (C). Scale bar = 20 μm. (D) Negative control with cells stained without primary antibody.

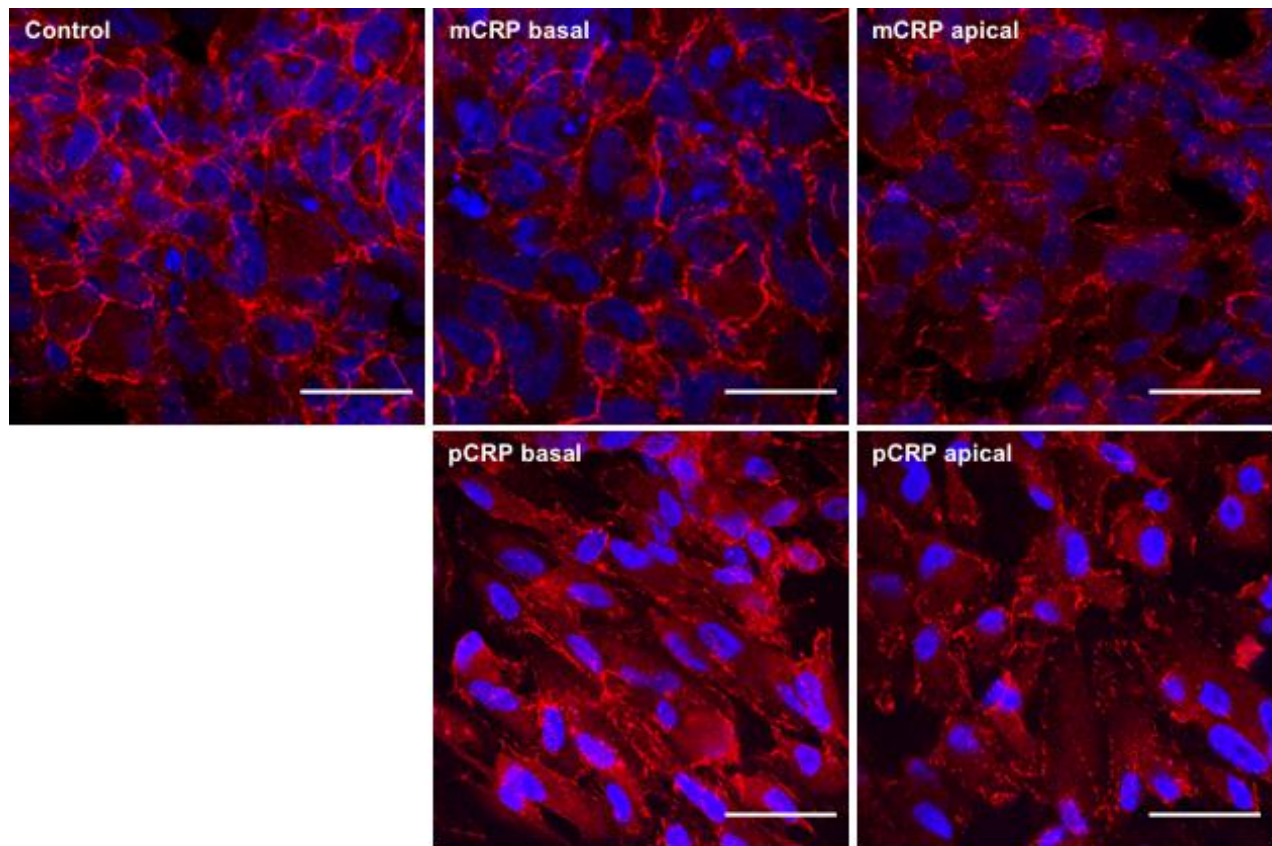

**Supplementary Figure 3. Effect of CRP isoforms on ZO-1 expression in ARPE-19 cells.** Cells were fixed and immunostained with anti ZO-1 (red) and DAPI (blue). Scale bar = 30 µm.

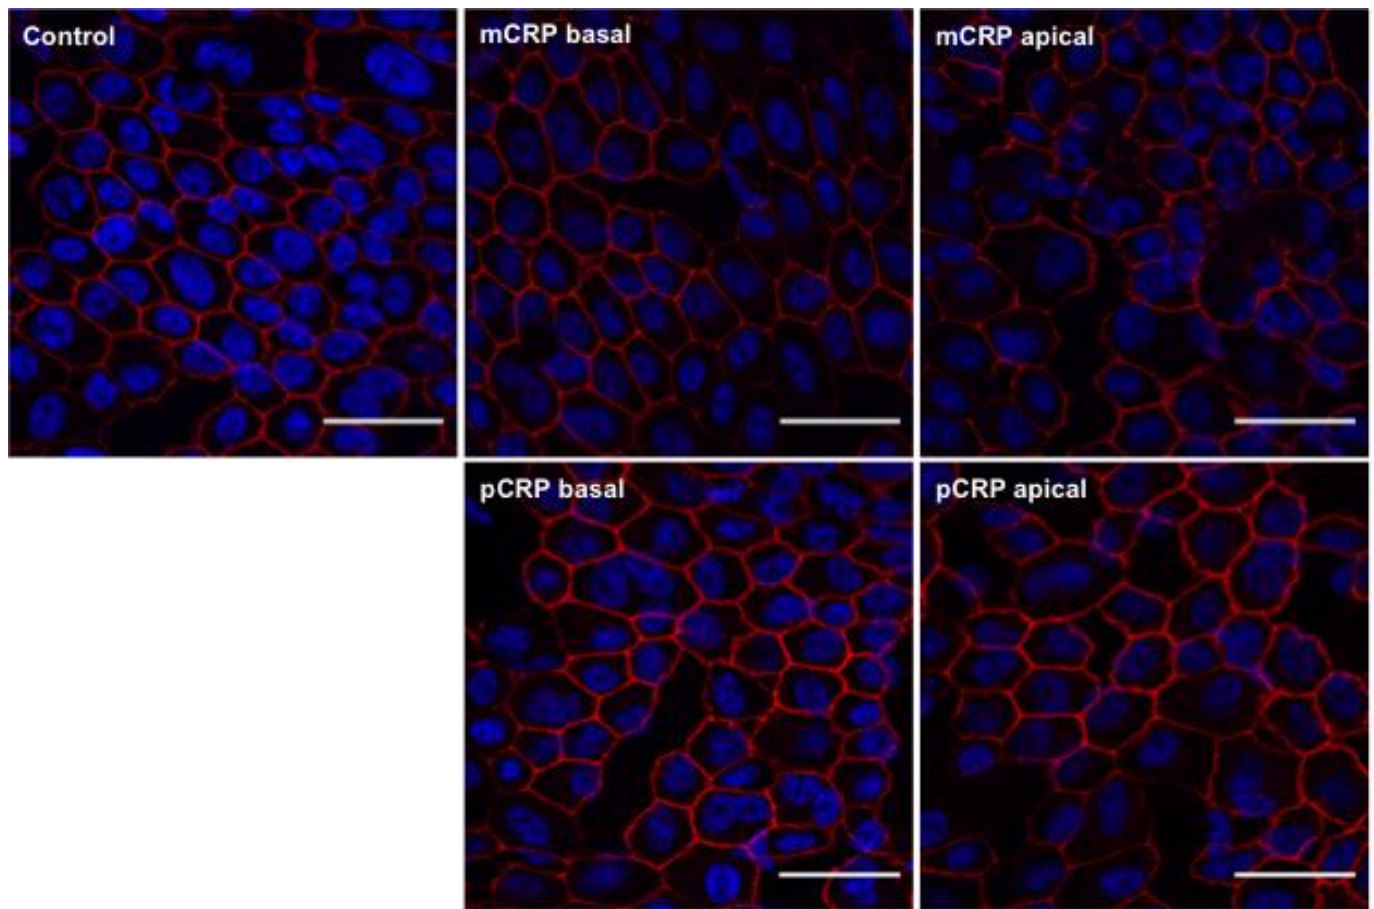

**Supplementary Figure 4. Effect of CRP isoforms on ZO-1 expression in primary porcine RPE cells.** Cells were fixed and immunostained with anti ZO-1 (red) and DAPI (blue). Scale bar = 30 μm.
